# Supplementary material
Source: PubMed Central journal article supplement (PMC4314436)

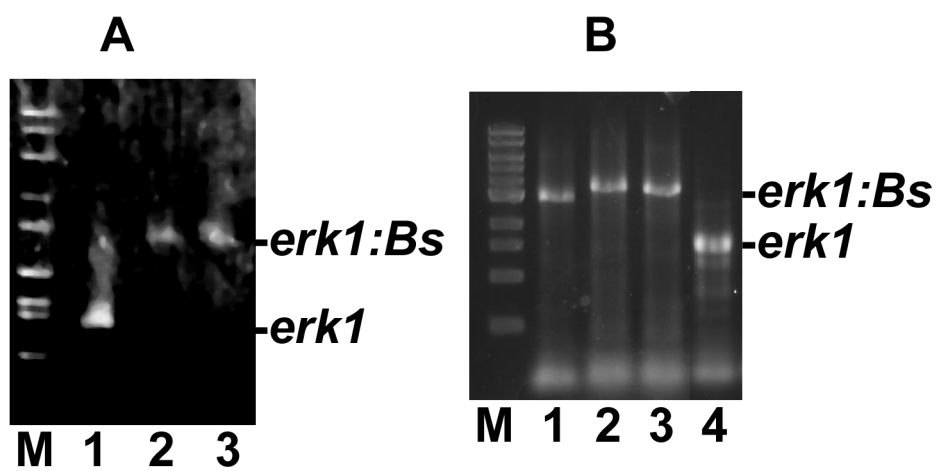

**Additional Figure  
Figure S1**

Supplement: NIHMS639686-supplement.pdf [file NIHMS639686-supplement.pdf]
